# Supplementary material for: The winds are twisting: analysis of strong directional shear across the rotor plane using coastal lidar measurements and ERA5
Source: Copernicus journal article supplement (doi:10.5194/wes-2023-129), 2023-10-16
Supplement: Supplementary file 1 [file wes-2023-129-supplement.pdf]

Supplement for The winds are twisting: analysis of strong directional shear across the rotor plane using coastal lidar measurements and ERA5

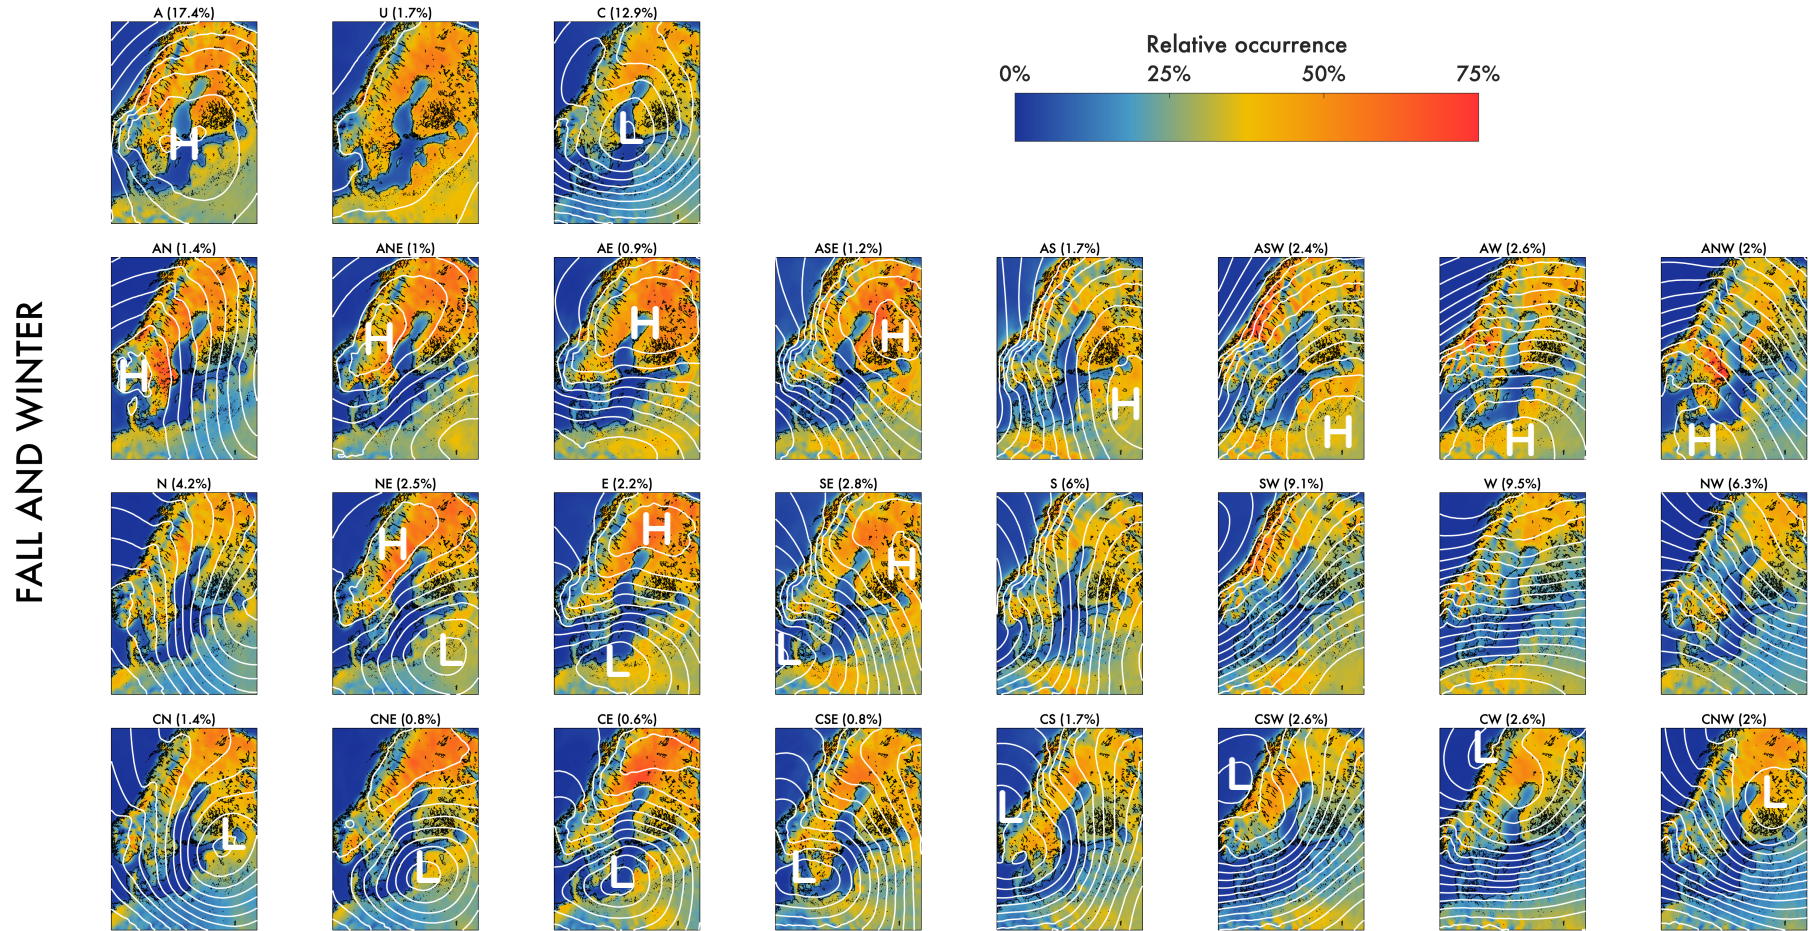

Figure S1: Relative occurrence of strong directional shear ( $>15^\circ$ ) in all LWTs based on hourly ERA5 data for the fall–winter season (September to February) in the period 1979–2021. The relative occurrence of each LWT is indicated. High pressure centers (H) and low-pressure centers (L) are marked in the panels, as well as isobars (every 2nd hPa) for the averaged pressure sea level pressure field.

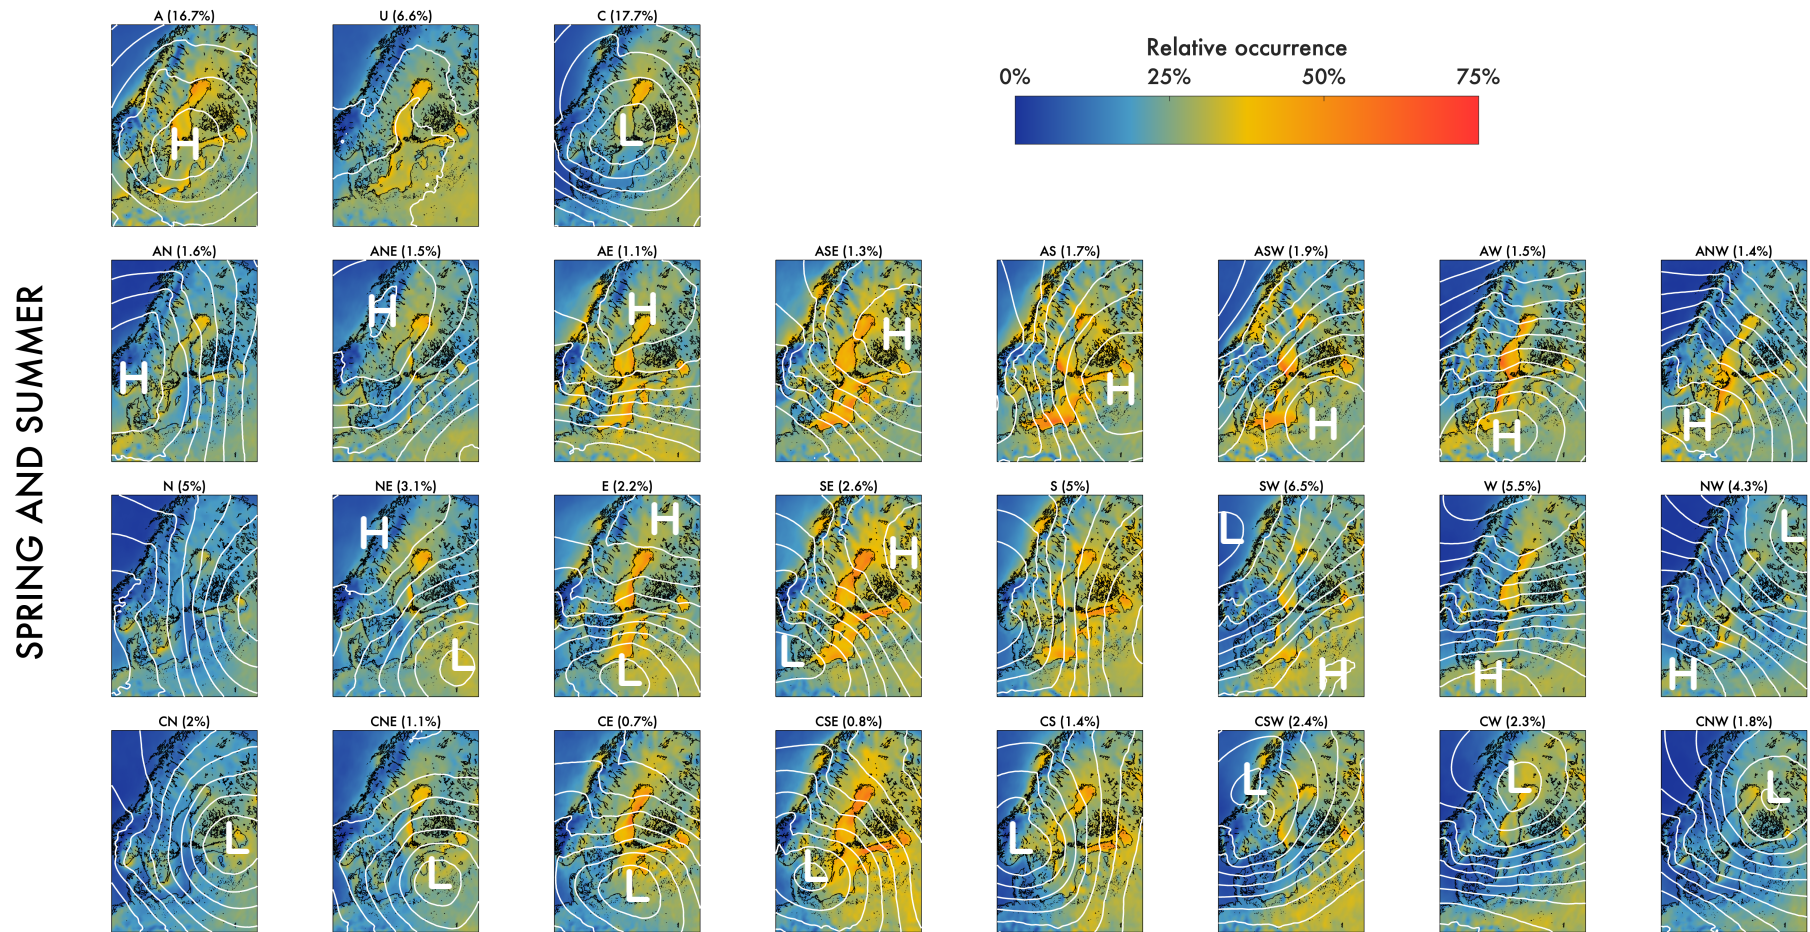

Figure S2: Relative occurrence of strong directional shear ( $>15^\circ$ ) in all LWTs based on hourly ERA5 data for the spring–summer season (March to August) in the period 1979–2021. The relative occurrence of each LWT is indicated. High pressure centers (H) and low-pressure centers (L) are marked in the panels, as well as isobars (every 2nd hPa) for the averaged pressure sea level pressure field.
